## **How Transcranial Magnetic Stimulation over Early Visual Cortex impacts short-term memory precision and guess rate**

Rosanne L. Rademaker<sup>1,2</sup>, Vincent G. van de Ven<sup>2</sup>, Frank Tong<sup>3</sup>, and Alexander T. Sack<sup>2</sup>

<sup>1</sup>Psychology Department, University of California San Diego, USA

<sup>2</sup>Cognitive Neuroscience Department, Maastricht University, Maastricht, The Netherlands

<sup>3</sup>Psychology Department, Vanderbilt University, Nashville, TN, USA

Corresponding author: Rosanne L. Rademaker ([rrademaker@ucsd.edu](mailto:rrademaker@ucsd.edu))

|                                 |            |
|---------------------------------|------------|
| Abstract                        | 254 words  |
| Main text                       | 7409 words |
| Number of figures               | 5          |
| Figure legends                  | 772 words  |
| Number of supplementary figures | none       |

Keywords: visual short-term memory, working memory, orientation, TMS, precision, guessing, mixture-model, early visual cortex

## Abstract

1 Neuroimaging studies have demonstrated that activity patterns in early visual areas  
2 predict stimulus properties actively maintained in visual short-term memory. Yet, the  
3 mechanisms by which such information is represented remain largely unknown. In this  
4 study, observers remembered the orientations of 4 briefly presented gratings, one in each  
5 quadrant of the visual field. A 10Hz Transcranial Magnetic Stimulation (TMS) triplet  
6 was applied directly at stimulus offset, or midway through a 2-second delay, targeting  
7 early visual cortex corresponding retinotopically to a sample item in the lower hemifield.  
8 Memory for one of the four gratings was probed at random, and participants reported this  
9 orientation via method of adjustment. Replication errors were smaller when the visual  
10 field location targeted by TMS overlapped with that of the cued memory item, compared  
11 to errors for stimuli probed diagonally to TMS. This implied topographic storage of  
12 orientation information, and a memory-enhancing effect at the targeted location.  
13 Furthermore, early pulses impaired performance at all four locations, compared to late  
14 pulses. Next, response errors were fit empirically using a mixture model analysis to  
15 characterize memory precision and guess rates. Memory was more precise for items  
16 proximal to the pulse location, irrespective of pulse timing. Guesses were more probable  
17 with early TMS pulses, regardless of stimulus location. Thus, whereas TMS administered  
18 at the offset of the stimulus array might disrupt early-phase consolidation in a  
19 topographically unspecific manner, TMS also boosts the precise representation of an item  
20 at its targeted retinotopic location, perhaps by increasing attentional resources or by  
21 injecting a beneficial amount of noise.

## Introduction

22 Humans sense the world in a highly visual fashion – the flow of information from the  
23 eyes gives rise to an ostensibly effortless and seamless picture of our external  
24 environment. Despite its apparent simplicity, visual perception requires the brain to form  
25 an ongoing internal representation of all the information we are perceiving and perceived  
26 just moments ago, even if this information can no longer be sensed directly. Short-term  
27 memory takes center stage in the process of cognition by allowing relevant information to  
28 be kept online for further computation, serving as an indispensable buffer for human  
29 thought. Here, we investigated short-term memory for visual information and the role of  
30 early visual cortex during the maintenance of such information.

31 How might the brain meet the computational demands associated with the maintenance of  
32 information to which it no longer has access? The act of keeping visual memories online  
33 involves a network of frontal [1,2] and parietal [3-5] regions, as well as visual areas that  
34 were involved when the information was originally sensed [6-9]. The coordinated effort  
35 of higher-level and sensory brain regions during the short-term retention of visual  
36 information is believed to be flexible and goal dependent [10]. The dominant view in the  
37 literature on short-term memory is that higher-level areas recruit sensory areas that are  
38 specialized in processing the sensory analogs of specific mnemonic contents [11-14].

39 It has been suggested that sensory recruitment during visual memory is achieved in a  
40 spatially global and non-retinotopic manner: While people remembered an orientation  
41 presented in the left visual field, this orientation was decodable from patterns of  
42 functional Magnetic Resonance Imaging (fMRI) activity originating from *both* ipsi- and  
43 contralateral primary visual cortex (V1) [1,15]. However, the task used in these studies  
44 did not require subjects to maintain the relevant feature (here: orientation) bound to any  
45 specific location on the screen. Therefore, the lack of retinotopic recruitment could also  
46 be interpreted as a spread of feature-based attention [16-18]. Conversely, memory for  
47 visual information does depend on retinotopically specific representations when stimulus  
48 location is made relevant, and the explicit binding of stimulus contents to a particular

49 location is required to perform a task. For example, location matters when people  
50 remember objects in a scene [19,20], when two orientations are presented one in each  
51 hemifield [8], or when location is made salient by a spatial transformation during  
52 memory [21,22].

53 To directly probe the causal role of sensory areas during the retention of visual stimuli, as  
54 well as the spatial extent of such recruitment, brain processes during memory can be  
55 actively altered by means of Transcranial Magnetic Stimulation (TMS). Previous work  
56 with TMS has provided support for both the necessity of visual sensory recruitment [23],  
57 as well as retinotopically specific maintenance of representations in these areas [24,25].  
58 However, previous TMS studies demonstrating that the spatial extent of memory  
59 representations was confined in a retinotopic manner suffered some drawbacks:  
60 Specificity was only found very early during retention, probably during encoding [24], or  
61 was measured indirectly via the qualitative judgment of phosphenes [25]. Thus, while  
62 these studies suggest that brain stimulation has the potential to impact visual memories at  
63 the level of sensory representations, it remains to be seen whether retinotopically specific  
64 effects on performance can be found when TMS is applied outside of the range of  
65 sensory encoding.

66 While sensory recruitment during visual short-term memory has been well documented in  
67 studies measuring blood oxygenation with fMRI, the functional role of such recruitment  
68 is much less understood. In addition to the issue of retinotopic specificity, a second  
69 unanswered question concerns the functional role of sensory recruitment during short-  
70 term memory maintenance. Given that sensory areas can represent information with a  
71 degree of precision not easily achieved by less specialized areas, we hypothesized that  
72 their role during memory is to maintain high-precision representations.

73 Here, questions of *specificity* and *functional relevance* were addressed by applying TMS  
74 over occipital cortex while participants were remembering four oriented gratings,  
75 presented one in each quadrant of the visual field. By cuing memory based on spatial  
76 location, this task encouraged participants to encode and retain orientation information at  
77 the spatial locations at which they were presented. This design binds object identity to

78 spatial position [26] allowing us to test for retinotopically specific recruitment of visual  
79 sensory cortex during short-term visual memory. To probe the functional role of sensory  
80 areas during the maintenance of orientation information, we employed a novel  
81 combination of methodologies: We combined TMS with rigorous psychophysical testing  
82 using the method of adjustment. This procedure involved collecting many trials per  
83 participant, calculating the angular deviation between the reported and true orientation on  
84 each trial, and analyzing the resultant error distributions by fitting a mixture model [27].  
85 A mixture model characterizes memory errors as having two underlying sources:  
86 response variability and probability of uniform responses [27]. We applied this model to  
87 evaluate, respectively, the effects of TMS on memory precision and the effects of TMS  
88 on the likelihood of successful memory maintenance (i.e. “guess-rate”).

89 Pulses were applied at two different time intervals to check for potential differences  
90 between processes occurring at the tail end of encoding, and processes occurring well  
91 within the retention phase. Previous work showed that behavioral effects of visual cortex  
92 TMS during short-term memory depends on the timing of TMS [28]. In this study,  
93 participants remembered a circle with two lines extending from its center, forming a  
94 wedge. After a two-second delay participants judged whether a target dot appeared inside  
95 or outside of the remembered wedge. When TMS over visual cortex was applied at the  
96 end of the delay, responses were faster compared to vertex or no TMS stimulation. By  
97 contrast, TMS over visual cortex applied at the onset of the delay slowed response times  
98 [28]. Because brain stimulation interacts with ongoing neural activity at the stimulated  
99 region [29,30] we expected that TMS at different stages of retention (encoding and  
100 maintenance), would differentially impact behavioral outcomes.

101 Our primary hypothesis was that TMS over visual cortex would impact memory precision  
102 (but not guess-rate) in a retinotopically specific manner. A change in precision is  
103 expected based on the clear link that exists between information contents in visual cortex  
104 (as indexed by classification performance) and mnemonic resolution (as indexed by  
105 behavior), with more information predicting higher behavioral precision [6] [31]. One  
106 means by which TMS could impact behavior is by locally injecting random noise. Such

107 noise could act to reduce the amount of information at the TMS location in visual cortex,  
108 and consequently negatively impact behavioral precision. Alternatively, at low levels of  
109 noise behavioral precision could improve: If weak neural signals are below (firing)  
110 threshold, a small amount of noise can push the intensity of these weak signals above  
111 threshold, enhancing signal discriminability – an idea known as ‘stochastic resonance’.  
112 Note that effects of noise on information transfer are non-linear, because with no (or too  
113 little) noise a threshold will not be reached, while too much noise will drown out the  
114 signal. Indeed, visual sensitivity is improved with low-intensity (below phosphene  
115 threshold) TMS stimulation [32], and low-intensity TMS facilitates behavior based on  
116 weak, but not strong, neural signals [33]. Mnemonic signals likely rely on weak sub-  
117 threshold signals, and low-intensity visual cortex TMS during short-term memory has  
118 indeed been shown to benefit behavior [25,28,34].

119 Here we found that TMS applied during the short-term retention of orientation stimuli  
120 improved overall behavioral performance in a retinotopically specific manner. This  
121 localized improvement mirrored by an increase in memory precision at the TMS location.  
122 Furthermore, TMS early during retention – at the tail end of encoding – resulted in a  
123 global, non-retinotopic, reduction in overall performance compared to TMS late during  
124 retention. This reduction in performance was mirrored by an increase in the likelihood of  
125 guess-like responses.

## Methods

### Participants

126 Eight participants were recruited from Maastricht University (5 females; mean age =  
127 25.13 years, SE = 0.81). All had normal or corrected-to-normal vision, provided written  
128 informed consent, and passed a medical screening based on published safety guidelines  
129 [36] overseen by an independent medical supervisor. The medical ethics committee of the  
130 Maastricht University Medical Centre approved the study. With exception of one of the  
131 authors, participants received monetary reimbursement.

## Overall study design

132 We combined functional and anatomical MRI, with neuro-navigated TMS during a  
133 psychophysical short-term memory task (Fig 1A). Neuroimaging was utilized for the  
134 purpose of neuro-navigation [37], allowing constant TMS stimulation sites across  
135 multiple psychophysical sessions based on individually localized visual cortical activity.  
136 During the first (fMRI) session, anatomical and functional localizer data were obtained.  
137 The second (TMS) session determined the exact TMS target points and intensities to be  
138 used throughout subsequent experimental sessions, and participants furthermore  
139 performed 160 practice trials of the main psychophysical task.

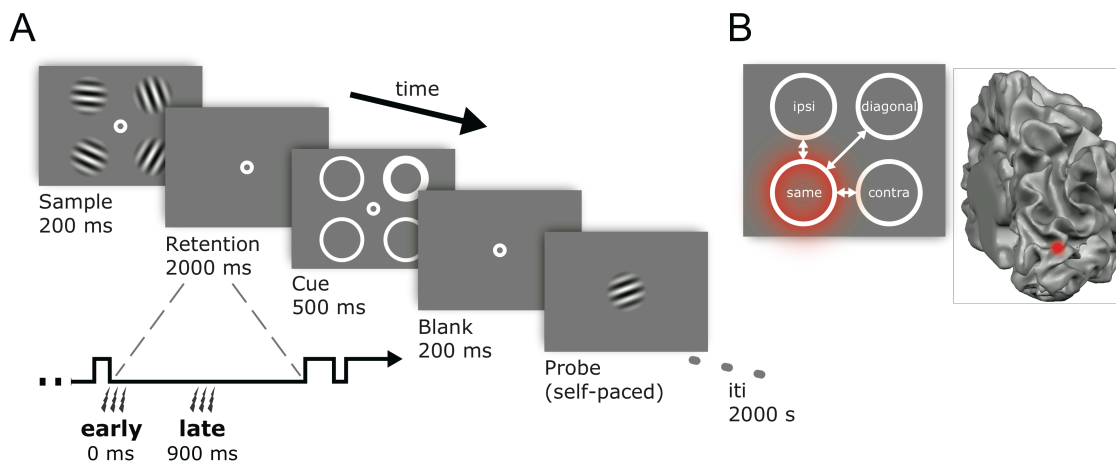

**Fig 1. Trial sequence and relative locations. (A)** Participants viewed a sample array displaying 4 randomly chosen orientations, and remembered these over a two-second delay. During this retention interval, participants received 3 pulses of real or sham TMS over their left or right hemisphere. The pulses arrived either directly at the offset of the sample array, or midway during the retention interval. A cue array indicated which of the four orientations was probed for recall, and after a short blank, participants rotated a test grating via button presses to match the cued orientation. **(B)** Responses at the four visual field locations were analyzed according to their position relative to the pulse. The visual field position targeted by the pulse could overlap with the memory item that was cued ('same'), the cued item could be contralateral to the affected visual field location ('contra'), it could be ipsilateral to it ('ipsi'), or diagonal to it ('diagonal'). In the example depicted here, the dorsal part of visual cortex in the right hemisphere is stimulated, targeting the lower-left visual field. Consequently, the upper left position becomes 'ipsi', the upper right position 'diagonal', the lower left 'same', and the lower right position 'contra' – relative to the visual field location affected by the TMS pulse.

140 During the last 5-6 sessions psychophysical data was collected while applying TMS over  
141 visual cortex. A TMS coil (real or sham) was placed over either the left or the right dorsal  
142 part of early visual cortex (V1/V2). Sham TMS was used to control for attentional

143 biasing effects that can arise simply from “clicking” sounds at different points in time  
144 [37]. For half of our participants, a single session consisted of 4 blocks of 80 short-term  
145 memory trials per block, of which three blocks involved triple-pulse TMS stimulation at  
146 10 Hz, and one block involved triple-pulse sham stimulation at 10 Hz. Target hemisphere  
147 (left or right) and type of stimulation (real or sham) were counterbalanced over blocks,  
148 sessions, and participants. The other half of participants underwent the same procedure,  
149 with one exception: they performed the blocks of sham-stimulation separately, several  
150 months after completing the real TMS sessions.

## **MRI measurements**

### *MRI acquisition*

151 Scanning was performed at the Maastricht Brain Imaging Center (M-BIC) on a 3.0-Tesla  
152 Siemens MAGNETOM Allegra scanner using a standard birdcage head coil. A high-  
153 resolution 3D anatomical T1-weighted scan was acquired from each participant (FOV  
154 256 x 256, 1 x 1 x 1 mm<sup>3</sup> resolution, 192 slices, MPRAGE). To measure BOLD contrast,  
155 standard gradient-echo echoplanar T2\*-weighted imaging was used to collect 28 slices  
156 covering the entire occipital lobe. Scan parameters for six participants were: TR, 2000  
157 ms; TE, 30 ms; flip angle, 80°; FOV 192 x 192; slice thickness, 3 mm (no gap); in-plane  
158 resolution, 3 x 3 mm<sup>2</sup>. For two others scan parameters were: TR, 2000 ms; TE, 30 ms;  
159 flip angle, 90°; FOV 256 x 256; slice thickness, 2 mm (no gap); in-plane resolution, 2 x 2  
160 mm<sup>2</sup>.

### *MRI data analysis*

161 Preprocessing and analysis of the anatomical and functional MRI data were performed  
162 using BrainVoyager QX software (version 2.3.0.1750, Brain Innovation, Maastricht, the  
163 Netherlands). All anatomical data underwent inhomogeneity correction of signal intensity  
164 across space, and a tissue contrast enhancement using a sigma filter (7 cycles, range 5).  
165 Automatic grey-white matter segmentation was performed, after which manual  
166 corrections were made to improve segmentation over occipital cortex. The borders of the  
167 two resulting segmented sub-volumes were tessellated to produce surface reconstructions



168 (folded meshes) – one for each hemisphere. These reconstructions were created to  
169 recover the exact spatial structure of the cortical sheet and to improve the visualization of  
170 anatomical gyrification.

### *functional MRI*

171 Localizer stimuli in the scanner were generated using MATLAB 7.10.0 (R2010a) and the  
172 Psychophysics Toolbox [38]. Stimuli consisted of 5 Hz flickering black-and-white  
173 checkerboards (1° radius) presented 4° from fixation in either the lower left or lower right  
174 (randomly interleaved) quadrant of the screen against a uniform grey background (55.86  
175 cd/m<sup>2</sup>). Stimulus locations encompassed the same visual field position as the two lower  
176 Gabor patches in the short-term memory task (Fig 1A). Stimuli were viewed through a  
177 mirror system on a back-projected screen (1024 x 768 resolution, 60 Hz refresh rate) at a  
178 distance of 66 cm in an otherwise darkened scanner room. We presented our localizer in  
179 two 5-minute functional runs, alternating twelve times between a 12 second fixation  
180 period and a 12 second stimulus period. Participants fixated throughout (0.5° white bull's  
181 eye) monitoring occasional dimming of the checkerboard (~5 times per block), which  
182 was detected 43.18% of the time (SE=0.04).

183 After discarding the first 4 functional volumes, we applied automated 3D motion  
184 correction, slice-scan time correction (sinc), and high pass temporal filtering (using a  
185 GLM-Fourier basis set with 2 cycles) to correct for slow temporal drifts in signal  
186 intensity. No spatial or temporal smoothing was applied directly. Next, the fMRI data  
187 was aligned to the within-session anatomical scan via rigid-body transformations, with all  
188 automated alignment carefully inspected and manually fine-tuned when necessary.  
189 Functional data from both runs were combined and analyzed using a general linear model  
190 (GLM; [39]). Activity for the left and right hemispheres was based on the statistical  
191 contrast between BOLD signal [40] elicited by visual stimulation in the lower right  
192 versus lower left visual field respectively.

### **Localization of the TMS target points**

193 The anatomical reconstruction of a participant's head was co-registered with the

194 participant's head in real space using stereotaxic data recorded with an ultrasound  
195 digitizer. Neuro-navigation was used to manually maneuver the TMS coil relative to a  
196 participant's skull, while seeing in real-time their computer generated anatomical surface  
197 reconstruction with functional localizer activity superimposed. TMS target points were  
198 defined to lie within this region of activation. Specifically, each target point was chosen  
199 as posteriorly as possible within this region of activation, while still eliciting a phosphene  
200 overlapping the visual field location where stimuli would be presented (3–5° from  
201 fixation in lower left and right quadrants). Each TMS target point was indicated on the  
202 cortical surface reconstruction by a digital marker and saved to guide neuro-navigation  
203 for all future sessions. Phosphene thresholds were determined for the left and right  
204 hemispheres individually (at the saved TMS target points) and kept constant throughout  
205 all future sessions. Two participants did not experience phosphenes: target points were  
206 chosen at the peak-activity determined with fMRI, and stimulation intensity was set at the  
207 average intensity of other participants in the study.

### **TMS protocol**

208 Biphasic TMS pulses were delivered by means of a figure-of-eight coil (MCB70) and a  
209 MagPro R30 stimulator (Medtronic Functional Diagnostics A/S, Skovlunde, Denmark).  
210 This setup allows for pulse strengths (defined as the rate of change in the magnetic pulse)  
211 up to 148 A/ $\mu$ s at 100% of stimulator output, and 52 A/ $\mu$ s at 35% stimulator output.  
212 Pulses were applied at 80% of phosphene threshold to ensure that participants did not  
213 perceive visual stimulation (i.e. phosphenes) due to TMS.

214 Participants received 240 TMS pulses (3 pulses \* 80 trials) during each run of the short-  
215 term memory task, and performed a total of 16 runs. The average pulse intensity used  
216 was 34.44% (SE=0.54) of maximum stimulator output, with no significant difference  
217 between the two hemispheres (mean left = 35 %, mean right = 33.88%,  $t = 1.386$ ,  $p =$   
218 0.208).

### **Short-term memory task**

### *Stimuli*

219 Experimental stimuli were generated with MATLAB 7.10.0 (R2010a) and the  
220 Psychophysics toolbox [38] under Windows XP and viewed in a dark room on a  
221 luminance-calibrated 19" Dell TFT monitor (1280 x 1024 resolution, 60Hz refresh rate).  
222 Communication between the experimental pc and stimulator was established using  
223 PortTalk V2.0 (Beyond Logic). Stimuli consisted of randomly oriented gratings with a  
224 spatial frequency of 2 cycles/°, a diameter of 2°, a 20% Michelson contrast with a wide  
225 Gaussian envelope ( $sd = 2^\circ$ ) and presented on a uniform grey background that shared the  
226 mean luminance of 40.23 cd/m<sup>2</sup>. Stimuli were presented at four fixed locations around a  
227 central fixation point at an eccentricity of 4°. Participants viewed the stimuli from 57 cm,  
228 and were instructed to maintain steady fixation throughout aided by a centrally presented  
229 white bull's eye (0.5° diameter). A chinrest, forehead rest, and the tight placement of the  
230 TMS coil against the back of the head assisted in maintaining head stability.

### *Procedure*

231 Observers were presented with a 200 ms sample array of 4 to-be-remembered gratings  
232 (Fig 1A). Each grating had an independently chosen random orientation (0-180°), with  
233 the only constraint that simultaneously presented orientations differed by >10°. During a  
234 2-second retention interval a TMS triple-pulse was applied at 10 Hz (thus taking 200 ms)  
235 either directly following the offset of the sample array, or midway through the retention  
236 interval (the first pulse occurring 900 ms into the interval). Next, 4 spatial cues appeared  
237 for 500 ms outlining the locations of the previously presented sample stimuli. A 0.15°  
238 wide white circle probed the location of the grating to be reported from memory. Non-  
239 target locations had 0.05° outlines. After 200 ms a test grating was presented centrally at  
240 an initially random orientation. Participants used separate buttons on a keyboard to rotate  
241 the test grating clockwise or counterclockwise to match the probed orientation. Cue  
242 location was conceived of as counterbalanced (with each location probed an equal  
243 amount of times), but due to unforeseen circumstances the cue location was chosen  
244 randomly, without exactly equal amounts of trials at each location (see also  
245 supplementary information).

## 246 **Analyses**

247 Due to anatomical constraints, TMS can only be applied over the dorsal (and not ventral)  
248 part of visual cortex. Thus, TMS can only target the two lower (and not upper) of the four  
249 stimulus-locations probed during our memory task. Previous studies have relied on this  
250 anatomical feature to contrast behavioral performance between a ‘TMS quadrant’  
251 (usually the lower left) and a ‘control quadrant’ (usually the upper right)[24,41-43]. In  
252 the current task, the memory target could be cued in all four visual field quadrants.  
253 Consequently, data were analyzed according to the relationship between (1) the visual  
254 field location targeted by the TMS pulse, and (2) the visual field location probed for  
255 recall. To illustrate this analysis based on “relative location”, let’s assume that during a  
256 given block of trials the right hemisphere was stimulated with TMS, targeting the lower-  
257 left visual field (see also Fig 1B). If the target was subsequently cued in the same lower-  
258 left quadrant, both TMS and stimulus were presented at the “same” relative location. On  
259 trials where the target was cued in the upper-left quadrant (ipsilateral to the TMS-pulse  
260 location) the relative location was “ipsilateral”. Similarly, a target cued in the lower-right  
261 quadrant is at a “contralateral” relative location, whereas a target cued in the upper-right  
262 quadrant is at a “diagonal” relative location. The same logic can be applied when the coil  
263 is moved to the left hemisphere, targeting the lower-right visual quadrant.

264 Note that the *diagonal* location represents the *control quadrant*, as frequently employed  
265 in TMS studies of visual cortex. Such a control quadrant carries two major advantages  
266 over sham stimulation. One is that the diagonal location is probed randomly interleaved  
267 with trials probing other locations, ensuring that participants are in the same general state  
268 during both trial types. Second is that real TMS is applied even when participants are  
269 probed at the control quadrant, ensuring that the acoustics and tactile experience during  
270 these trials perfectly matches that of other probed locations.

271 To separately estimate the precision of memory for successfully remembered items and  
272 the likelihood of memory failure we adopted a mixture-model approach following the  
273 work of Zhang and Luck (2008). This model summarizes data from method-of-

274 adjustment tasks in a way that reflects the underlying assumptions of the model: on some  
275 trials items are remembered with a certain degree of precision, whereas on other trials  
276 items are not available for recall resulting in random guesses. This idea was implemented  
277 by fitting a circular Gaussian-shaped model to the distribution of orientation errors  
278 (actual orientation minus reported orientation) for each condition of interest. The model  
279 consisted of two key parameters: One is the standard deviation (*SD*), or width of the  
280 circular portion of the distribution, assumed to reflect the precision of short-term memory  
281 for successfully remembered items (with better precision indicated by a smaller *SD*). Two  
282 is the relative proportion of area under the curve corresponding to a uniform distribution  
283 (*p-Uniform*), which captures the extent to which the entire distribution needed to be  
284 translated along the y-axis to account for the frequency of guess-like responses, and is  
285 assumed to reflect the probability of guessing responses. We rely on these summary  
286 statistics throughout this paper because they provide a useful way to capture broad trends  
287 in the data and because they may signify distinct types of errors. However, it is important  
288 to acknowledge that the mapping between these summary statistics and underlying  
289 sources of error in the short-term memory system rely on assumptions regarding the exact  
290 nature of short-term memory performance, and that competing models have been  
291 proposed (e.g., [44-48]).

## Results

### Absolute performance

292 Experimental manipulations consisted of (1) probing memory for items at various relative  
293 distances from the visual field location targeted by TMS, and (2) applying TMS early or  
294 late during memory retention. Moreover, TMS was applied in a counterbalanced fashion  
295 either over the left- or right hemisphere, which was not expected to impact performance.  
296 By performing a 3-way within-subjects ANOVA (4 relative locations x 2 pulse timings x  
297 2 stimulated hemispheres) on the absolute errors (absolute difference between reported  
298 and true orientation) we confirmed that the stimulated hemisphere (left or right) did not  
299 affect memory accuracy ( $F_{(1,7)} < 0.001$ ;  $p = 0.986$ ).

300 Proximity of a memory item to the visual field location targeted by TMS while items  
301 were being maintained in memory had a facilitative effect on memory performance, as  
302 indexed by smaller errors for items proximal to the pulsed location (main effect of  
303 relative location;  $F_{(3,21)} = 3.951$ ;  $p = 0.022$ ; Fig 2). Six post-hoc ANOVA's were  
304 performed to investigate the origins of this main effect of location, each comparing  
305 performance at two locations (each 2 relative locations x 2 pulse timings x 2 stimulated  
306 hemispheres). The location effect depended on the difference between trials on which the  
307 TMS pulses and probed location overlapped ('same' condition) versus when they were  
308 furthest apart ('diagonal' condition, i.e. the control quadrant) ( $F_{(1,7)} = 5.598$ ;  $p = 0.050$ ).

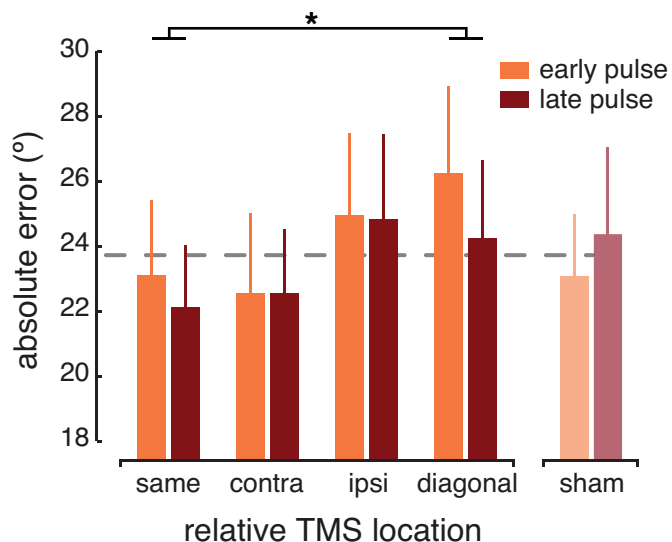

**Fig 2. Absolute performance relative the TMS location.** When a memory item was cued at the same location as targeted by the TMS pulses, the absolute response error was smaller than when a memory item was probed diagonally to the pulses. This indicated better performance on trials where memory cue location and TMS location overlap (compared to a cue diagonal to TMS). Early pulses resulted in worse performance compared to late pulses, irrespective of the cued visual field location. Trials during which TMS was administered are shown here after collapsing across both hemispheres, since stimulation site (left or right hemisphere) did not affect participant's performance. Sham data is shown collapsed across all conditions (dashed grey line), and separately for early and late sham pulses (orange and red bars). The time point at which audible sham clicks were delivered did not impact behavior. When data were collapsed across both hemispheres (as depicted here), a 4x2 ANOVA (relative location by pulse timing) revealed statistically reliable performance differences between the four visual field locations ( $F_{(3,21)} = 3.483$ ;  $p = 0.034$ ) and a marginally significant effect of pulse timing ( $F_{(1,7)} = 4.820$ ;  $p = 0.064$ ). Error bars depict  $\pm 1$  SEM.

309 Comparing the two pulse-timings showed that applying TMS pulses early, directly at the  
310 offset of the stimulus display, resulted in larger errors than TMS applied midway through  
311 the retention interval (main effect of pulse timing;  $F_{(1,7)} = 6.359$ ;  $p = 0.040$ ).

312 Audible ‘clicks’ from a TMS machine can have differential attentional cuing effects  
313 when presented at different time points [37], with the potential to influence behavior  
314 differently early and late during retention. Because sham TMS has no neural effects, we  
315 collected a total of 320 sham trials (160 per pulse timing) to investigate potential effects  
316 of timing. While this is the right amount of trials for looking at timing effects, note that  
317 this is much less than the 1280 trials collected during real TMS, precluding analyses of  
318 the sham data in a manner truly identical to analyses of the real TMS data. We analyzed  
319 sham data by first looking at our condition of interest, pulse timing, while collapsing  
320 across all other factors (location and hemisphere). The time point at which sham pulses  
321 were applied did not impact performance ( $t_{(7)} = 0.647$ ;  $p = 0.538$ ). We also compared  
322 performance for absolute location (comparing upper left, upper right, lower left, and  
323 lower right locations) and hemisphere (left and right) collapsing across the remaining  
324 factors. Again, no differences were observed ( $F_{(3,21)} = 0.459$ ;  $p = 0.714$  and  $t_{(7)} = 1.013$ ;  $p$   
325  $= 0.345$ , for location and hemisphere respectively). The finding that there were no  
326 differences between any of the conditions on sham trials is important, since our  
327 manipulations could have had unintended differential attentional-cuing effects,  
328 mimicking the neural effects probed via TMS.

### Mixture-model results

329 To gain a deeper understanding into the functional role of early visual cortex involvement  
330 during the maintenance of visual memories, we fit a mixture model to data from each  
331 combination of location and pulse timing conditions (collapsed across hemispheres). This  
332 allowed us to decompose the absolute errors into (1) memory precision as indexed by the  
333 mixture model  $SD$  (with a smaller  $SD$  indicating better precision), and (2) the likelihood  
334 of guess-like responses indexed by  $p$ -Uniform (with a larger  $p$ -Uniform indicating more  
335 guessing) [27].

336 When a memory target was probed at a location proximal to the location targeted by  
337 TMS, memory recall was more precise (4 relative locations  $\times$  2 pulse timings ANOVA,  
338 main effect of relative location;  $F_{(3,21)} = 4.102$ ;  $p = 0.019$ ; Fig 3A). Specifically, six post-  
339 hoc ANOVA’s (comparing all possible pairs of relative locations) showed that memory

340 was more precise on trials where the pulses and probed memory item overlapped, i.e.  
341 ‘same’ condition, ( $F_{(1,7)} = 7.974$  ;  $p = 0.026$ ) or were ‘ipsilateral’ to one another ( $F_{(1,7)} =$   
342  $7.658$  ;  $p = 0.028$ ), compared to trials on which the pulses and probed item were furthest  
343 apart (‘diagonal’, control quadrant).

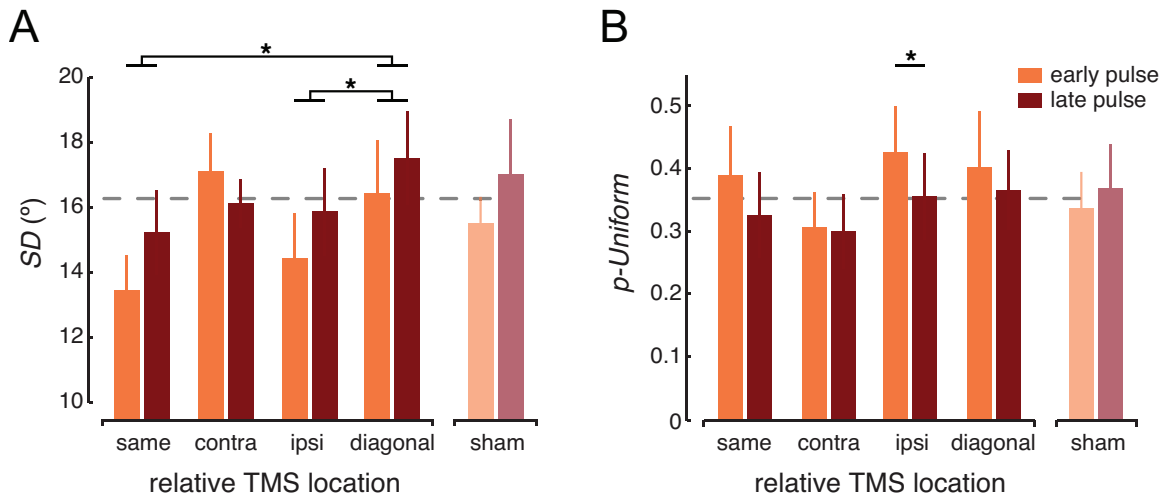

**Fig 3. Model fits of TMS data. (A)** Memory precision is represented by the mixed-model  $SD$ , with a smaller  $SD$  indicating more precise memory. Memory was most precise when the location of a cued memory item overlapped with the location at which TMS was applied, or was ipsilateral to it, compared to diagonally to pulses. **(B)** When pulses were delivered early during the retention interval, participants were more likely to guess compared to pulses delivered late, irrespective of their retinotopic location relative to TMS. Parameter estimates were obtained by finding the best-fitting mixture-model (centered on  $0^\circ$  error of report, based on the mixed model analysis) for the frequency distribution of each condition, using a bin width of  $12^\circ$  (mean  $R^2 = 0.894 \pm 0.029$ ). Bin size was chosen to maximize the mean  $R^2$  values across the different experimental conditions. Data were collapsed across hemispheres (left and right stimulation) before fitting in order to achieve a large enough number of trials per condition to obtain reliable fits. Error bars depict  $\pm 1$  SEM.

344 No retinotopic specificity was found for the probability of uniform responses, which did  
345 not differ significantly between the four visual field locations ( $F_{(1,7)} = 1.831$ ;  $p = 0.172$ ).  
346 However, participants were more likely to show guess-like responses when pulses were  
347 presented early during the retention interval compared to pulses presented midway  
348 through retention (main effect of pulse timing;  $F_{(1,7)} = 6.594$ ;  $p = 0.037$ ; Fig 3B). This  
349 increase in random responses occurred irrespective of the location at which the memory  
350 item was probed (no interaction;  $F_{(3,21)} = 0.712$ ;  $p = 0.555$ ).

351 Finally, sham data were fit with a mixture model for each condition of potential interest



352 (pulse timing, and absolute location) separately, collapsing across all other conditions.  
353 Timing of the sham pulses did not affect memory variability (paired-samples  $t_{(7)} = 0.822$ ;  
354  $p = 0.438$ ) nor the probability of guess-like responses (paired-samples  $t_{(7)} = 1.262$ ;  $p =$   
355  $0.247$ ). We found no differences between the four absolute visual field locations for  
356 either memory precision ( $F_{(3,21)} = 0.976$ ;  $p = 0.423$ ) nor the probability of uniform  
357 responses ( $F_{(3,21)} = 1.272$ ;  $p = 0.310$ ).

### Memory performance across the visual field

358 A strength of our experimental setup was that the TMS coil was fixed over the skull,  
359 which, in combination with fMRI guided neuro-navigation, ensured that the targeted  
360 brain site remained stable relative to the four patches of retinotopic cortex excited by our  
361 stimuli. However, this setup had the obvious side effect that the stimuli were anchored  
362 onto four static visual field locations across all experimental trials. If perception and  
363 memory at these static visual field locations were anisotropic, this would complicate  
364 interpretation of our results. From the literature on basic human vision it is known that  
365 people are generally better at performing a visual task on stimuli in the lower, compared  
366 to the upper visual field. Luckily, such anisotropies are generally found for stimuli  
367 presented along the cardinal meridians, and less prevalent (or even absent) for stimuli  
368 presented at the obliques [49,50]. Nevertheless, any residual anisotropy would impact our  
369 results by biasing performance in favor of the lower half of the visual field, incidentally,  
370 the same half of the visual field targeted with TMS.

371 One crucial check was to investigate how memory on sham trials varied across the  
372 stimulus locations in the upper left, upper right, lower left, and lower right parts of the  
373 visual field. These results were already discussed above: During sham neither the  
374 absolute error ( $F_{(3,21)} = 0.459$ ;  $p = 0.714$ ), memory precision ( $F_{(3,21)} = 0.976$ ;  $p = 0.423$ ),  
375 nor the probability of uniform responses ( $F_{(3,21)} = 1.272$ ;  $p = 0.310$ ) varied as a function  
376 of visual field location probed. While this suggests that visual field anisotropies cannot  
377 explain our main findings, a null effect (absence of evidence) does not provide conclusive  
378 proof (evidence of absence). A second observation arguing against anisotropies is that,  
379 while results from the absolute performance seem to roughly align with the idea of upper-

380 lower visual field anisotropies (Fig 2), results from the fitted memory precision (Fig 3A)  
381 imply no such distinction.

382 Finally, we also directly probed whether real TMS and sham TMS interact, as such an  
383 interaction would provide the most convincing evidence against the idea that upper  
384 versus lower visual field anisotropies (rather than TMS effects) might be driving  
385 performance differences at the four locations. In order to perform this direct comparison,  
386 we analyzed the absolute performance during sham in a manner identical to that of real  
387 TMS: performance was determined at each of the four visual field locations relative to  
388 the location ‘targeted’ by sham (for example, a sham coil over the right hemisphere  
389 ‘targeted’ the lower left visual field). Data for both sham and real TMS were collapsed  
390 across stimulated hemisphere, resulting in 160 and 40 observations per condition on  
391 average for real and sham TMS respectively. An ANOVA comparing the 2 TMS  
392 conditions (real and sham), 2 pulse timings (early and late), and 4 locations (‘same’,  
393 ‘contra’, ‘ipsi’, and ‘diagonal’) revealed a significant interaction between pulse timing  
394 and location ( $F_{(3,21)} = 3.752$ ;  $p = 0.027$ ). Note that neither TMS condition and location  
395 ( $F_{(3,21)} = 0.204$ ;  $p = 0.893$ ) nor TMS condition and timing ( $F_{(1,7)} = 2.007$ ;  $p = 0.2$ )  
396 interacted significantly.

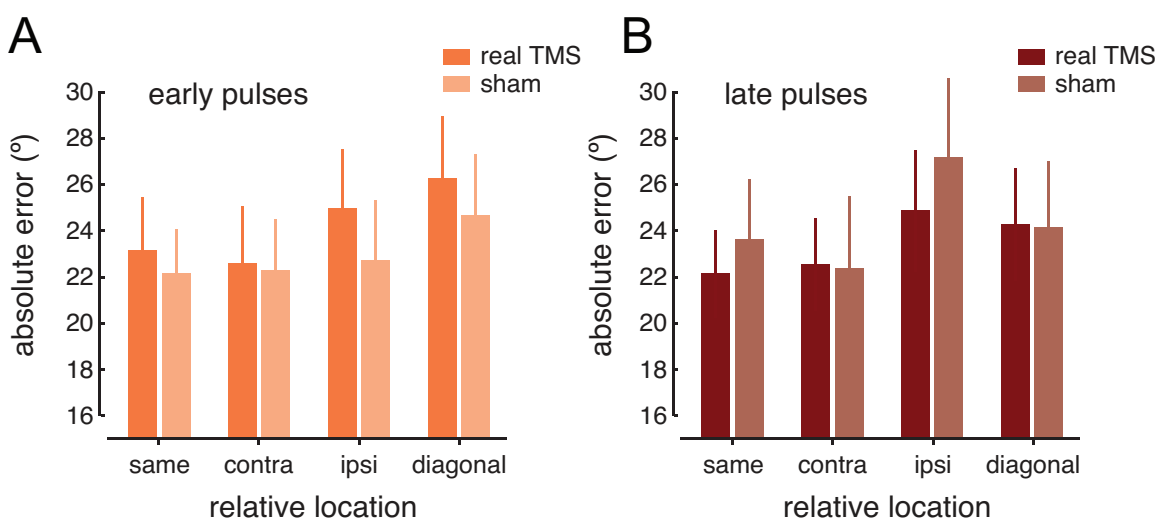

**Fig 4. Absolute performance during real and sham TMS. (A)** Performance when real or sham pulses were applied early during retention, directly at stimulus offset. **(B)** Performance for pulses (real or sham) applied midway through the retention interval. Error bars depict  $\pm 1$  SEM.

397 Thus, direct comparison of real and sham TMS did not yield entirely conclusive results.  
398 One obvious problem is that sham data could have been more variable due to the smaller  
399 number of trials, making comparisons less robust (but also note that 40 trials per  
400 condition is still considerable when not performing any fitting procedures). A more  
401 pertinent problem is that performance during TMS is not expected to differ from  
402 performance during sham outside of the TMS-targeted location. In fact, when we only  
403 considered visual field locations where real TMS is expected to yield an effect (i.e.  
404 overlapping with, or ipsilateral to, the targeted location) the interaction between TMS  
405 condition and timing did reach significance ( $F_{(1,7)} = 5.975$ ;  $p = 0.044$ ), suggesting that  
406 real TMS and sham differentially affect performance at different time points of memory  
407 maintenance.

## Discussion

408 While participants were remembering four orientations, 10Hz triple-pulse TMS was  
409 applied over early visual cortex retinotopically corresponding to the location of one of the  
410 to-be-remembered items. Orientation recall differed between the four locations at which  
411 stimuli had been presented, with better performance at the location targeted by TMS  
412 compared to the location diagonal to TMS. Additionally, memory was impaired for early  
413 (directly at stimulus offset) compared to late (midway through retention) pulses.  
414 Replication errors were fit with a mixture model to reveal relative contributions of  
415 changes in memory variability on the one hand, and the probability of guessing responses  
416 on the other: Spatially specific improvements proximal to the pulse were attributed to  
417 reduced response variability, implying that memory precision can be improved locally by  
418 means of TMS. Global impairments for early compared to late pulses were due to an  
419 increased likelihood of guess-like responses, implying retinotopically aspecific  
420 disturbances due to TMS at the tail end of encoding. A cartoon-summary of these  
421 findings is shown in Figure 5. None of these findings were observed with sham TMS.  
422 While it is possible that performance at the four stimulus locations differed because of  
423 visual field anisotropies, such anisotropic contributions were likely not driving the  
424 observed TMS effects.

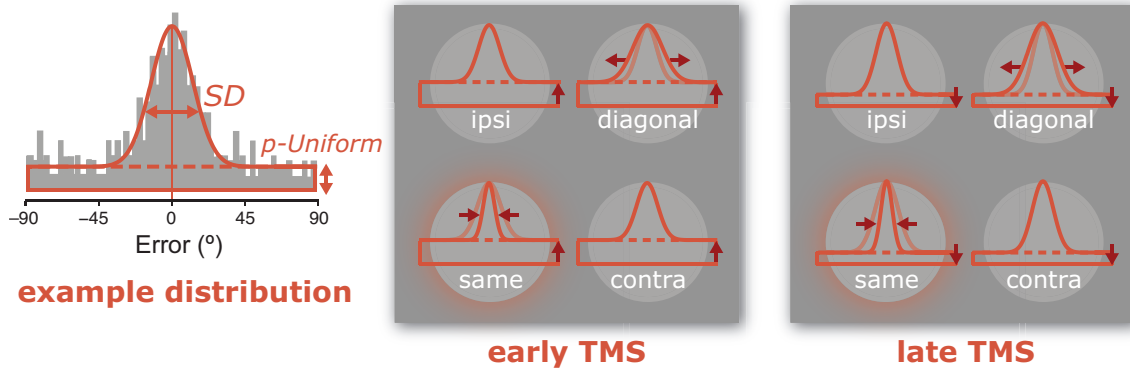

**Fig 5. Cartoon summary of results.** The left most panel depicts an example response distribution. The frequency of response errors (i.e. difference between cued orientation and response) is indicated by the height of the grey bars. Most responses are centered on a mean replication error of 0°, and the precision with which this replication is achieved is captured by the mixture model *SD* parameter (smaller *SD* indicates more precision). Some responses appear to be random guesses, indicated by the probability of guesses or ‘uniform responses’ (< *p-Uniform* means less guessing). A mixture model fit to the response errors is depicted in thick orange lines. The two rightmost panels provide a cartoon summary of our main results (exaggerated and simplified for illustrative purposes). First, the main effect of relative location is shown by increased memory precision (*SD*) at the location targeted by TMS (‘same’) compared to the control quadrant (‘diagonal’) for both early and late TMS pulses (compare *SD* at four visual field locations). Second, the main effect of pulse timing is shown by increased guessing when pulses were applied early compared to pulses applied late irrespective of visual field location (compare *p-Uniform* between middle and right most panels).

425 Our task encouraged binding the memorized features to their visual field positions by  
426 making memory retrieval contingent upon spatial location. Limits on the spatial extent of  
427 sensory recruitment have been a matter of some debate, found in some cases [8] but not  
428 others [1,15]. Our findings of locally improved memory performance and precision  
429 provide support for retinotopically specific sensory recruitment during visual memory.  
430 What is more, this local improvement was present irrespective of the time point during  
431 which TMS was applied, demonstrating that TMS can impact visual short-term memories  
432 beyond the sensory encoding stage.

433 Why might early pulses lead to more guess-like responses than late pulses? Simple  
434 modulations of attention or distractibility due to the timing of the three auditory clicks  
435 emitted by the TMS coil could not explain this – using the same timing and sounds  
436 revealed no costs for early compared to late sham TMS. Guessing responses can result  
437 from forgetting, lapses of attention, or encoding failures. Since our early pulses were  
438 presented at the tail end of encoding [51-54], it is possible that TMS increased random

439 guesses by prohibiting adequate encoding of the four stimuli. This finding is in line with  
440 previous work showing disruptions to visual memory when TMS was applied over visual  
441 cortex during the early stages of retention [24,28]. However, this earlier work observed  
442 retinotopically specific disruptions. Why might we find that early pulses affected  
443 performance across the visual field?

444 First, while stimulus orientations were chosen randomly and independently, accidental  
445 yet strong ensemble effects probably occurred on a portion of trials by virtue of our  
446 design. Anticipating the fixed trial-by-trial spatial location of memory stimuli,  
447 participants could have adapted a strategy relying on the constellation of the four  
448 orientations (as radial, concentric, isotropic, etc.) rather than storing features in a truly  
449 independent manner. Perceptual grouping of elements allows more of them to be stored  
450 in memory [55], and taking perceptual grouping and higher-order structures between  
451 items into account helps explain memory performance [56,57]. Thus, early TMS pulses  
452 applied while participants were extracting global shape-like representations could disrupt  
453 encoding of the whole ‘object’ through the disturbance of localized ‘object features’ (i.e.  
454 orientations), resulting in increased guesses for all orientations during retrieval. Such an  
455 ‘object-based’ short-term memory strategy might be achieved by convergent feed-  
456 forward and feedback processes at multiple stages of the visual hierarchy [58,59] – an  
457 intriguing possibility that could be tested empirically in the future.

458 Second, a higher likelihood of guessing responses for early compared to late pulses  
459 implied that different processes (or global cognitive ‘states’) were occurring at different  
460 stages of the retention interval. A brain ‘state’ can refer to many things like general  
461 arousal level, attention or inattention, being trained or untrained, adapted or unadapted,  
462 etc. Acknowledging that TMS interacts with the initial brain state helps frame prior  
463 studies applying TMS over visual cortex during short-term memory maintenance,  
464 unveiling both performance *decrements* [23,24,28], as well as *improvements* [28,34].  
465 Specifically, it has been proposed that TMS may preferentially activate neurons in low  
466 initial activation states (i.e. low firing) relative to more active populations [30,60,61].  
467 Alternatively, the effect of TMS on neuronal firing is monotonic, but behavioral effects

468 (facilitation versus impairment) depend on non-linearity in the input response function of  
469 the sensory neurons [62]. Either way, additional mechanisms beyond global brain states  
470 must be assumed to account for *local* improvements in memory precision that exist  
471 independent (and in addition to) the *global* TMS timing effects reported here.

472 First, TMS might enhance processing of a memorized orientation *locally*. For example,  
473 we used low-intensity TMS, which could protect local populations of neurons at the TMS  
474 location against temporal decay by pushing weak signals above threshold. A related idea  
475 is that TMS enhancement depends on non-monotonic intensity responses [62] as  
476 mentioned above: The first basic premise is that TMS acts via a wholesale multiplication  
477 of neural responses. The second premise is that while remembering an orientation, the  
478 memory trace of that orientation in a population of orientation selective neurons is weak,  
479 with firing rates only slightly elevated above baseline. In terms of intensity response, the  
480 remembered orientation has a response that is slightly larger than that of not-remembered  
481 orientations. However, because of the nonlinearity of intensive response profiles, a  
482 wholesale multiplication by any factor due to TMS would result in higher signal-to-noise  
483 for the remembered orientation. Conceivably, such signal-to-noise benefits could be  
484 induced with TMS on a directly perceived orientation as well, as long as contrast remains  
485 lower than the inflection point of the contrast response function, and intensive responses  
486 undergo expansive nonlinearity.

487 Second, participants in our experiment simultaneously remembered multiple stimuli  
488 presented at *distributed locations*, each stimulus competing for processing resources. This  
489 raises the possibility that mnemonic representations interacted and that TMS yoked  
490 competition spatially, in favor of the targeted retinotopic location. By enhancing neural  
491 firing at one of multiple task-relevant locations, TMS might mimic spatial attention: It's  
492 been shown that in the absence of a visual stimulus, spontaneous firing rates in V2 and V4  
493 were elevated when attention was directed at a location that fell within a cell's receptive  
494 field [63]. Thus, TMS might act as a bottom-up implementation of an otherwise top-  
495 down biasing signal, potentially by means of a spatial gating mechanism that favors the  
496 boosted location during subsequent processing stages [64].

497 Note that the results reported here seem to indicate a mixture of both improved and  
498 impaired performance more proximal and distal to TMS respectively. Thus, TMS might  
499 be attenuating regulatory processes that mediate competition between orientation  
500 representations at distributed visual field locations. This can be framed in terms of a  
501 recent population-coding model of short-term memory [14,65,66] that assumes stimulus  
502 features (like orientation) are stored by probabilistic spiking activity in tuned populations  
503 of neurons. Critically, this model includes a broad normalization component by keeping  
504 the sum of the firing rates remains constant (across changes in set size or attentional  
505 prioritization, for example) [46,65]. Normalization describes neuronal responses as  
506 consisting of an input or ‘drive’, divided by the summed activity of a normalization pool  
507 [67,68]. The assumption that normalization occurs between all items held in memory  
508 could explain our findings via a multiplicative increase of the input drive of neurons at  
509 the TMS site, biasing the overall population activity in favor of the TMS location (and  
510 against non-TMS locations).

511 Alternatively, inhibitory interactions might exist between the four simultaneously  
512 remembered orientations: At a local level, TMS can release orientation representations  
513 from inhibitory interactions during a tilt illusion paradigm [69]. Likewise, in our study  
514 TMS could have acted to depress horizontal connections between spatially distributed  
515 representations, attenuating interference at the targeted location. In the brain, lateral  
516 connections between neurons in posterior visual areas with relatively large aggregate  
517 receptive field sizes [70], monosynaptic trans-colossal connections between the primary  
518 visual hemispheres [71], or top-down influences from for example prefrontal cortex  
519 [65,72] are all routes through which interactions between multiple and spatially  
520 distributed stimulus representations might arise.

521 These ‘local’ and ‘distributed’ hypotheses about improved processing at the TMS  
522 location, while thought-provoking, should be tested empirically in future work to  
523 ascertain their true value. To that, we’d like to add some additional considerations  
524 regarding the work presented here. First, noisy performance from a couple of participants  
525 precluded reliable fitting using Maximum Likelihood Estimation. Instead we binned the

526 data in bins of 12° before deriving parameter estimates. While rather coarse, this bin size  
527 was chosen to maximize  $R^2$  values, and results were comparable for analyses using  
528 smaller bins (i.e. 8° or 10°). Error fitting performed in this way is purely empirical, unlike  
529 model fitting, and could even be considered the better choice here. However, it should be  
530 noted that when applying a maximum likelihood approach the directionality of effects  
531 was preserved, but neither precision differences across the visual field ( $F_{(3,21)} = 1.837$ ;  $p =$   
532  $0.171$ ), nor the pulse timing effects on guessing responses ( $F_{(1,7)} = 2.854$ ;  $p = 0.135$ )  
533 remained significant.

534 Second, TMS effects are usually small, and people's response to TMS highly variable,  
535 which is why TMS results generally benefit from large sample sizes. Instead, here we  
536 opted for an in depth psychophysical approach, spanning many sessions and trials. The  
537 strength of our design is that it allowed us to investigate the mechanistic underpinnings  
538 memory maintenance in visual cortex. Our findings dovetail previous reports of  
539 retinotopically [24] and temporally [28] specific effects of visual cortical TMS on short-  
540 term memory. In addition, our findings suggest that memory precision is affected  
541 retinotopically, while effects of pulse timing are likely a matter of global state-like  
542 processes. The trade-off however, was a relatively smaller number of participants.

543 Despite these cautionary notes, our results provide several consistent and intriguing  
544 findings. Combining the mixture-model with TMS offered novel insights into the role of  
545 early visual cortex during the short-term retention of visual items in memory, while  
546 affirming the involvement of these areas. We were able to uncover a double dissociation,  
547 showing local changes in memory precision at the TMS location, and global changes in  
548 guess rates contingent on pulse timing, with more frequent guesses for TMS applied at  
549 the tail end of encoding compared to midway during the delay. Our work adds to an  
550 existing literature demonstrating retinotopically specific sensory recruitment [8] and early  
551 visual cortex TMS impacting visual short-term memory [24,25,28].



## Acknowledgements

We would like to thank Sam Ling for valuable input during the analysis stage and long Skype sessions regarding the contents in the Discussion.

## 552 References

- 553 1. Ester EF, Sprague TC, Serences JT. Parietal and Frontal Cortex Encode Stimulus- Specific Mnemonic  
554 Representations during Visual Working Memory. *Neuron*. 2015; 87: 1–13.
- 555 2. Riggall AC, Postle BR. The relationship between working memory storage and elevated activity as measured  
556 with functional magnetic resonance imaging. *J Neurosci*. 2012; 32(38): 12990–8.
- 557 3. Christophel TB, Hebart MN, Haynes J-D. Decoding the contents of visual short-term memory from human  
558 visual and parietal cortex. *J Neurosci*. 2012;32(38): 12983–9.
- 559 4. Todd JJ, Marois R. Capacity limit of visual short-term memory in human posterior parietal cortex. *Nature*.  
560 2004;428(6984): 751–4.
- 561 5. Xu Y, Chun MM. Dissociable neural mechanisms supporting visual short-term memory for objects. *Nature*.  
562 2006;440(2): 91–5.
- 563 6. Emrich SM, Riggall AC, LaRocque JJ, Postle BR. Distributed Patterns of Activity in Sensory Cortex Reflect  
564 the Precision of Multiple Items Maintained in Visual Short-Term Memory. *J Neurosci*. 2013;33(15): 6516–23.
- 565 7. Harrison S, Tong F. Decoding reveals the contents of visual working memory in early visual areas. *Nature*.  
566 2009;458(7238): 632–5.
- 567 8. Pratte MS, Tong F. Spatial specificity of working memory representations in the early visual cortex. *J Vis*.  
568 2014;14(3): 1–12.
- 569 9. Serences JT, Ester EF, Vogel EK, Awh E. Stimulus-Specific Delay Activity in Human Primary Visual Cortex.  
570 *Psychological Science*. 2009;20(2): 207–14.
- 571 10. Lee S-H, Kravitz DJ, Baker CI. Goal-dependent dissociation of visual and prefrontal cortices during working  
572 memory. *Nature*. 2013;16(8): 997–9.
- 573 11. Awh E, Jonides J. Overlapping mechanisms of attention and spatial working memory. *Trends Cogn Sci (Regul*  
574 *Ed)*. 2001;5(3): 110–126.
- 575 12. D'Esposito M. From cognitive to neural models of working memory. *Philos Trans R Soc Lond, B, Biol Sci*.  
576 2007;362(1481): 761–72.
- 577 13. Jonides J, Lacey SC, Nee DE. Processes of working memory in mind and brain. *Current Directions in Psych*.  
578 *Sci*. 2005;14(1): 2–5.
- 579 14. Sreenivasan KK, Vytlačil J, D'Esposito M. Distributed and Dynamic Storage of Working Memory Stimulus  
580 Information in Extrastriate Cortex. *J Cogn Neurosci*. 2014;26(5): 1141–53.
- 581 15. Ester EF, Serences JT, Awh E. Spatially global representations in human primary visual cortex during working  
582 memory maintenance. *J Neurosci*. 2009;29(48): 15258–65.
- 583 16. Serences JT, Boynton GM. Feature-based attentional modulations in the absence of direct visual stimulation.  
584 *Neuron*. 2007;55(2): 301–12.
- 585 17. Sneve MH, Sreenivasan KK, Alnæs D, Endestad T, Magnussen S. Short-term retention of visual information:  
586 Evidence in support of feature-based attention as an underlying mechanism. *Neuropsychologia*. 2015;66(C):  
587 1–9.
- 588 18. Treue S, Martínez Trujillo JC. Feature-based attention influences motion processing gain in macaque visual  
589 cortex. *Nature*. 1999;399(6736): 575–9.

- 590 19. Hollingworth A. Scene and Position Specificity in Visual Memory for Objects. *J Exp Psychol Learn Mem*  
591 Cogn. 2006;32(1): 58–69.
- 592 20. Hollingworth A. Object-position binding in visual memory for natural scenes and object arrays. *J Exp Psychol*  
593 Hum Percept Perform. 2007;33(1): 31–47.
- 594 21. Zaksas D, Bisley JW, Pasternak T. Motion information is spatially localized in a visual working-memory task.  
595 *J Neurophysiol*. 2001;86(2): 912–21.
- 596 22. Pasternak T, Zaksas D. Stimulus specificity and temporal dynamics of working memory for visual motion. *J*  
597 *Neurophysiol*. 2003;90(4): 2757–62.
- 598 23. Silvanto J, Soto D. Causal evidence for subliminal percept-to-memory interference in early visual cortex.  
599 *NeuroImage*. 2012;59(1): 840–5.
- 600 24. van de Ven V, Jacobs C, Sack AT. Topographic Contribution of Early Visual Cortex to Short-Term Memory  
601 Consolidation: A Transcranial Magnetic Stimulation Study. *J Neurosci*. 2012;32(1): 4–11.
- 602 25. Silvanto J, Cattaneo Z. Transcranial magnetic stimulation reveals the content of visual short-term memory in  
603 the visual cortex. *NeuroImage*. 2010;50(4): 1683–9.
- 604 26. Woodman GF, Vogel EK, Luck SJ. Flexibility in Visual Working Memory: Accurate Change Detection in the  
605 Face of Irrelevant Variations in Position. *Visual Cognition*. 2012;20(1): 1–28.
- 606 27. Zhang W, Luck S. Discrete fixed-resolution representations in visual working memory. *Nature*.  
607 2008;453(7192): 233–5.
- 608 28. Cattaneo Z, Vecchi T, Pascual-Leone A, Silvanto J. Contrasting early visual cortical activation states causally  
609 involved in visual imagery and short-term memory. *Eur J Neurosci*. 2009;30(7): 1393–400.
- 610 29. Silvanto J, Pascual-Leone A. State-Dependency of Transcranial Magnetic Stimulation. *Brain Topogr*.  
611 2008;21(1): 1–10.
- 612 30. Silvanto J, Muggleton N, Walsh V. State-dependency in brain stimulation studies of perception and cognition.  
613 *Trends Cogn Sci (Regul Ed)*. 2008;12(12): 447–54.
- 614 31. van Bergen RS, Ji Ma W, Pratte MS, Jehee JFM. Sensory uncertainty decoded from visual cortex predicts  
615 behavior. *Nat Neurosci*. 2015;18(12): 1728–30.
- 616 32. Abrahamyan A, Clifford CWG, Arabzadeh E, Harris JA. Improving Visual Sensitivity with Subthreshold  
617 Transcranial Magnetic Stimulation. *J Neurosci*. 2011;31(9): 3290–4.
- 618 33. Schwarzkopf DS, Silvanto J, Rees G. Stochastic Resonance Effects Reveal the Neural Mechanisms of  
619 Transcranial Magnetic Stimulation. *J Neurosci*. 2011;31(9): 3143–7.
- 620 34. Soto D, Llewelyn D, Silvanto J. Distinct causal mechanisms of attentional guidance by working memory and  
621 repetition priming in early visual cortex. *J Neurosci*. 2012;32(10): 3447–52.
- 622 35. Rossi S, Hallett M, Rossini PM, Pascual-Leone A, Safety of TMS Consensus Group. Safety, ethical  
623 considerations, and application guidelines for the use of transcranial magnetic stimulation in clinical practice  
624 and research. *Clin Neurophysiol*. 2009;120(12): 2008–39.
- 625 36. Sack AT, Cohen Kadosh R, Schuhmann T, Moerel M, Walsh V, Goebel R. Optimizing functional accuracy of  
626 TMS in cognitive studies: a comparison of methods. *J Cogn Neurosci*. 2009;21(2): 207–21.
- 627 37. Duecker F, de Graaf TA, Jacobs C, Sack AT. Time- and Task-Dependent Non-Neural Effects of Real and  
628 Sham TMS. de Lange FP, editor. *PLoS ONE*. 2013;8(9): e73813.
- 629 38. Brainard DH. The Psychophysics Toolbox. *Spat Vis*. 1997;10(4): 433–6.

- 630 39. Friston KJ, Holmes AP, Poline JB, Grasby PJ, Williams SC, Frackowiak RS, et al. Analysis of fMRI time-  
631 series revisited. *NeuroImage*. 1995;2(1): 45–53.
- 632 40. Boynton GM, Engel SA, Glover GH, Heeger DJ. Linear systems analysis of functional magnetic resonance  
633 imaging in human V1. *J Neurosci*. 1996;16(13): 4207–21.
- 634 41. de Graaf TA, Koivisto M, Jacobs C, Sack AT. The chronometry of visual perception: Review of occipital  
635 TMS masking studies. *Neuroscience and Biobehavioral Reviews*. 2014;45: 295–304.
- 636 42. Jacobs C, de Graaf TA, Sack AT. *ScienceDirect. Cortex*. 2014;59(C): 1–11.
- 637 43. De Weerd P, Reithler J, van de Ven V, Been M, Jacobs C, Sack AT. Posttraining Transcranial Magnetic  
638 Stimulation of Striate Cortex Disrupts Consolidation Early in Visual Skill Learning. *J Neurosci*. 2012;32(6):  
639 1981–8.
- 640 44. Bays PM, Husain M. Dynamic shifts of limited working memory resources in human vision. *Science*.  
641 2008;321(5890): 851–4.
- 642 45. Bays PM, Catalao RFG, Husain M. The precision of visual working memory is set by allocation of a shared  
643 resource. *J Vis*. 2009;9(10): 1–11.
- 644 46. Bays PM. Noise in Neural Populations Accounts for Errors in Working Memory. *Journal of Neuroscience*.  
645 2014;34(10): 3632–45.
- 646 47. Fougne D, Suchow JW, Alvarez GA. Variability in the quality of visual working memory. *Nat Comms*.  
647 2012;3(1229): 1–8.
- 648 48. van den Berg R, Shin H, Chou W-C, George R, Ma WJ. Variability in encoding precision accounts for visual  
649 short-term memory limitations. *Proc Natl Acad Sci USA*. 2012;109(22): 8780–5.
- 650 49. Abrams J, Nizam A, Carrasco M. Isoeccentric locations are not equivalent: the extent of the vertical meridian  
651 asymmetry. *Vision Res*. 2012;52(1): 70–8.
- 652 50. Rovamo J, Virsu V, Laurinen P, Hyvärinen L. Resolution of gratings oriented along and across meridians in  
653 peripheral vision. *Invest Ophthalmol Vis Sci*. 1982;23(5): 666–70.
- 654 51. Chun M, Potter M. A two-stage model for multiple target detection in rapid serial visual presentation. *Journal*  
655 *of Experimental Psychology*. 1995;21(1): 109–27.
- 656 52. Jolicoeur P, Dell'Acqua R. The demonstration of short-term consolidation. *Cogn Psychol*. 1998;36(2): 138–  
657 202.
- 658 53. Vogel EK, Woodman GF, Luck SJ. The time course of consolidation in visual working memory. *J Exp*  
659 *Psychol Hum Percept Perform*. 2006;32(6): 1436–51.
- 660 54.
- 661 55. Luck SJ, Vogel EK. The capacity of visual working memory for features and conjunctions. *Nature*.  
662 1997;390(6657): 279–81.
- 663 56. Brady TF, Konkle T, Alvarez GA. Compression in visual working memory: using statistical regularities to  
664 form more efficient memory representations. *J Exp Psychol Gen*. 2009;138(4): 487–502.
- 665 57. Brady TF, Tenenbaum JB. A probabilistic model of visual working memory: Incorporating higher order  
666 regularities into working memory capacity estimates. *Psychol Rev*. 2013;120(1): 85–109.
- 667 58. Lamme VA, Roelfsema PR. The distinct modes of vision offered by feedforward and recurrent processing.  
668 *Trends Neurosci*. 2000;23(11): 571–9.

- 669 59. Pooresmaeili A, Roelfsema PR. A Growth-Cone Model for the Spread of Object-Based Attention during  
670 Contour Grouping. *Curr Biol*. 2014;24(24): 2869–77.
- 671 60. Matthews PB. The effect of firing on the excitability of a model motoneurone and its implications for cortical  
672 stimulation. *J Physiol*. 1999;518 (Pt 3): 867–82.
- 673 61. Siebner HR, Hartwigsen G, Kassuba T, Rothwell JC. How does transcranial magnetic stimulation modify  
674 neuronal activity in the brain? Implications for studies of cognition. *Cortex*. 2009;45(9): 1035–42.
- 675 62. Abrahamyan A, Clifford CWG, Arabzadeh E, Harris JA. Improving Visual Sensitivity with Subthreshold  
676 Transcranial Magnetic Stimulation. *J Neurosci*. 2011;31(9): 3290–4.
- 677 63. Luck SJ, Chelazzi L, Hillyard SA, Desimone R. Neural mechanisms of spatial selective attention in areas V1,  
678 V2, and V4 of macaque visual cortex. *J Neurophysiol. Am Physiological Soc*; 1997;77(1): 24–42.
- 679 64. Chen Y, Seidemann E. Attentional Modulations Related to Spatial Gating but Not to Allocation of Limited  
680 Resources in Primate V1. *Neuron*. 2012 May 10;74(3): 557–66.
- 681 65. Bays PM. Spikes not slots: noise in neural populations limits working memory. *Trends Cogn Sci (Regul Ed)*.  
682 2015;19(8): 431–8.
- 683 66. Stokes MG. “Activity-silent” working memory in prefrontal cortex: a dynamic coding framework. *Trends*  
684 *Cogn Sci (Regul Ed)*. 2015;19(7): 394–405.
- 685 67. Carandini M, Heeger DJ. Normalization as a canonical neural computation. *Nat Rev Neurosci*. 2011;13:51–62.
- 686 68. Heeger DJ. Normalization of cell responses in cat striate cortex. *Visual neuroscience*. 1992;92: 181–97.
- 687 69. Ling S, Pearson J, Blake R. Dissociation of Neural Mechanisms Underlying Orientation Processing in  
688 Humans. *Current Biology*. 2009;19(17): 1458–62.
- 689 70. Freeman J, Simoncelli EP. Metamers of the ventral stream. *Nat Neurosci*. 2011;14(9): 1195–201.
- 690 71. Berlucchi G, Rizzolatti G. Binocularly driven neurons in visual cortex of split-chiasm cats. *Science*.  
691 1968;159(3812): 308–10.
- 692 72. Edin F, Klingberg T, Johansson P, McNab F, Tegnér J, Compte A. Mechanism for top-down control of  
693 working memory capacity. *Proc Natl Acad Sci USA*. 2009;106(16): 6802–7.
